# Supplementary material
Source: MDPI journal article supplement (https://www.mdpi.com/2227-9040/11/9/490)
Supplement: s1 [file s1]

# Semiconductor Heterojunction-AgNPs Mediated Surface-Enhanced Raman Spectroscopy (SERS) Sensor for Portable Miniaturized Detection Platform

Chenyu Wang <sup>1</sup>, Xiaoyi Shi <sup>1</sup>, Zhiyong Bao <sup>1</sup>, Maofeng Zhang <sup>1,\*</sup>, Yonghui Shen <sup>2</sup> and Yucheng Wu <sup>1</sup>

<sup>1</sup> School of Chemistry and Chemical Engineering, Hefei University of Technology, 193 Tunxi Road, Hefei 230009, China; 2021216133@mail.hfut.edu.cn (C.W.); 2020110541@mail.hfut.edu.cn (X.S.); 2018800015@hfut.edu.cn (Z.B.); ycwu@hfut.edu.cn (Y.W.)

<sup>2</sup> Anhui Aochuang Environment Testing Co., Ltd., Weisan Road, Fuyang Economic and Technological Development Zone, Fuyang 236000, China; shenyonghui@acacdc.cn

\* Correspondence: mfzhang@hfut.edu.cn .

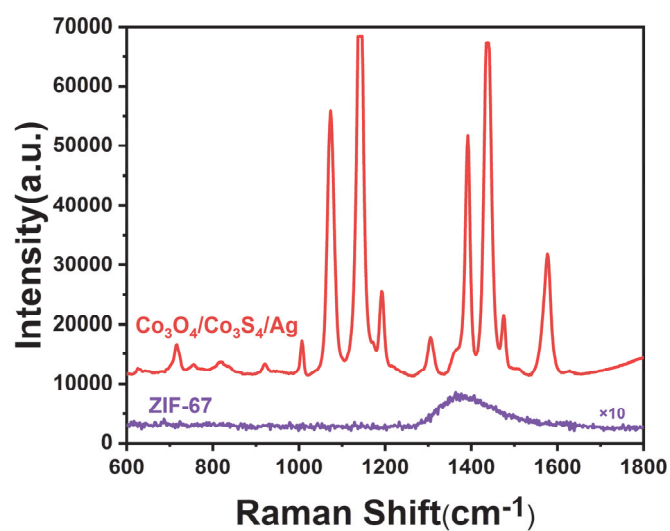

Figure S1. SERS spectra of  $\text{Co}_3\text{O}_4/\text{Co}_3\text{S}_4/\text{Ag}$  and ZIF-67.

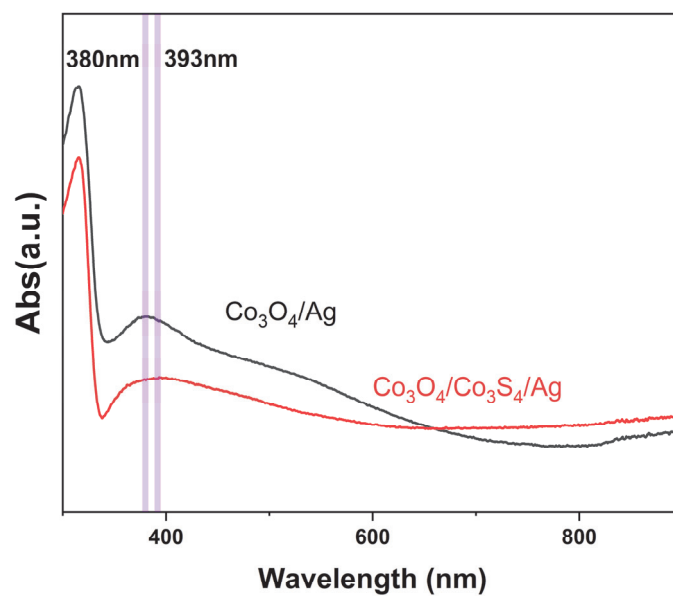

Figure S2. Ultraviolet absorption spectra of  $\text{Co}_3\text{O}_4/\text{AgNPs}$  and  $\text{Co}_3\text{O}_4/\text{Co}_3\text{S}_4/\text{AgNPs}$ .

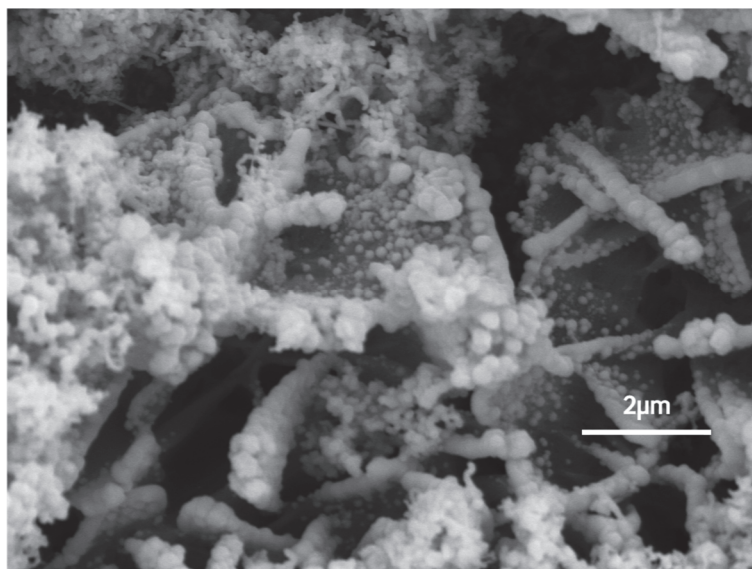

Figure S3. SEM images of  $\text{Co}_3\text{O}_4/\text{Co}_3\text{S}_4/\text{AgNPs}$ .

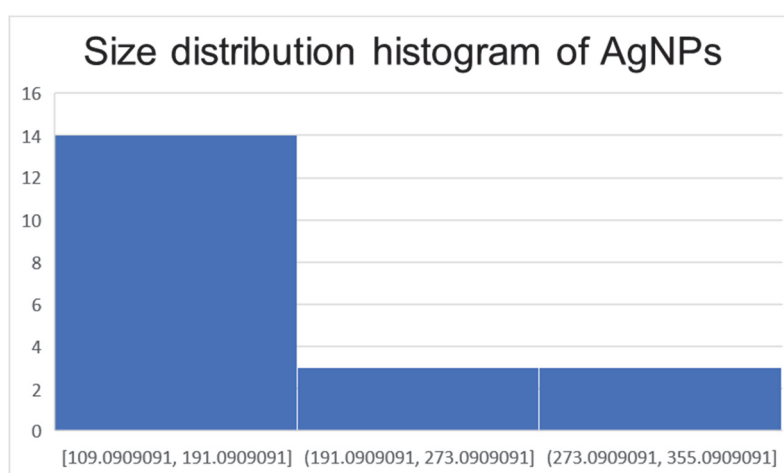

Table 1. Size distribution histogram of AgNPs.

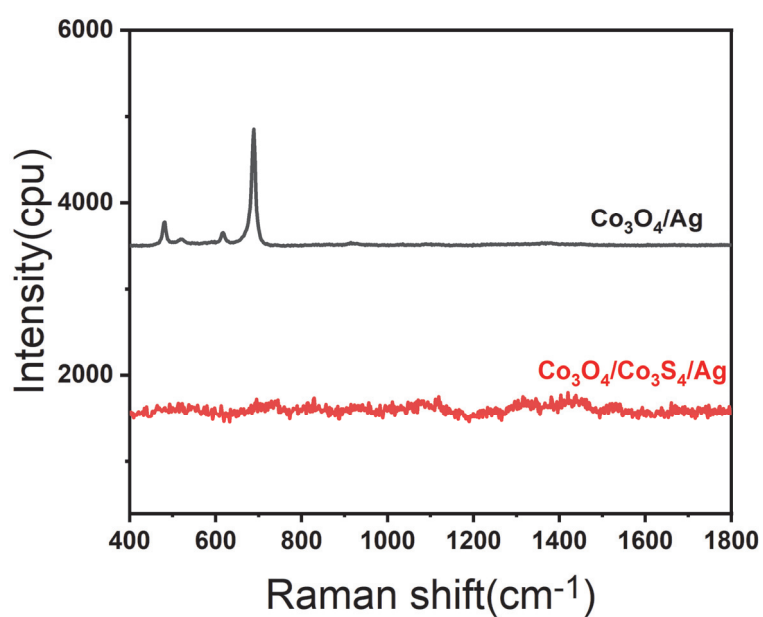

Figure S4. Raman spectrum for  $\text{Co}_3\text{O}_4/\text{AgNPs}$  and  $\text{Co}_3\text{O}_4/\text{Co}_3\text{S}_4/\text{AgNPs}$  substrates without analyte.

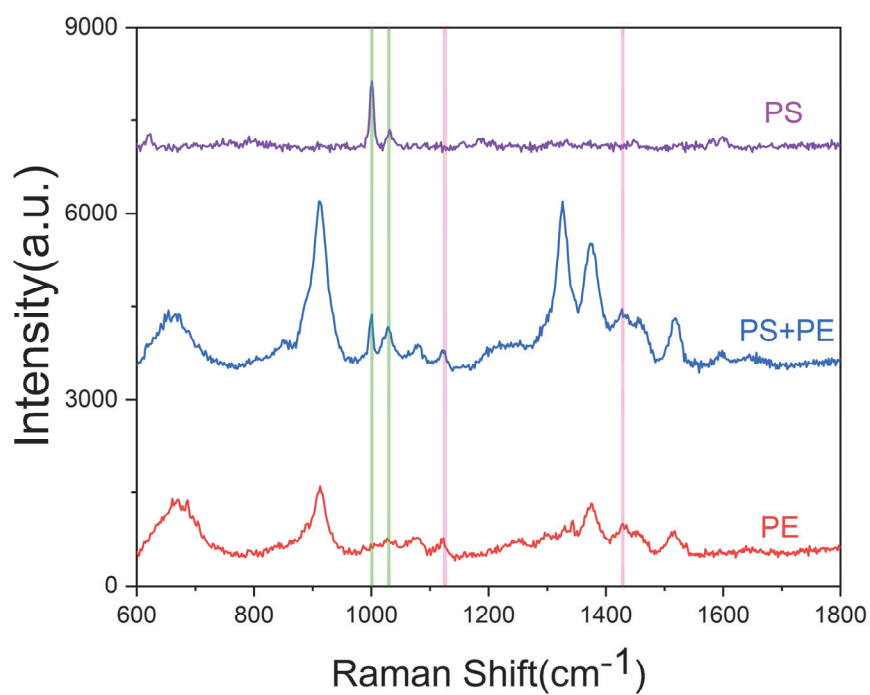

Figure S5. SERS spectra of PS and PE mixture.

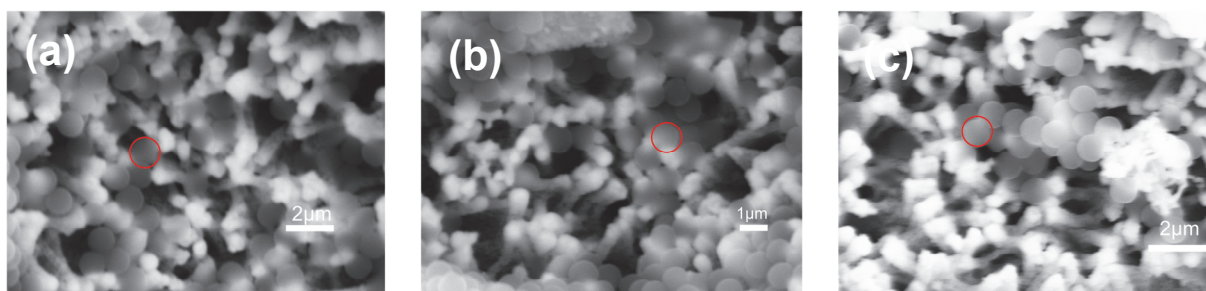

Figure S6. SEM images of plastic particles with diameters of (a)  $1\mu\text{m}$ ,  $2.5\text{mg/mL}$ , (b)  $1\mu\text{m}$ ,  $2\text{mg/mL}$  and (c)  $800\mu\text{m}$ ,  $2.5\text{mg/mL}$ .

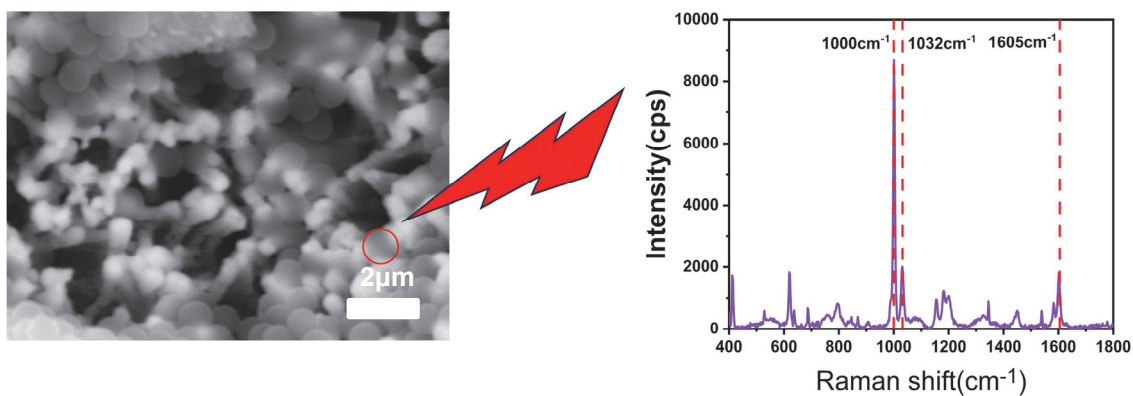

Figure S7. SEM image and SERS spectrum of 1  $\mu\text{m}$ , 2.5 mg/mL PS on the substrate.

### Calculation of SERS enhancement factor (EF)

To quantify the enhancement contribution from  $\text{Co}_3\text{O}_4/\text{AgNPs}$  and  $\text{Co}_3\text{O}_4/\text{Co}_3\text{S}_4/\text{AgNPs}$  substrates, we calculated their enhancement factor (EF) based on the following formula:

$$\text{EF} = (I_{\text{SERS}} / I_{\text{BULK}}) \times (N_{\text{BULK}} / N_{\text{SERS}})$$

where  $I_{\text{SERS}}$  and  $I_{\text{BULK}}$  represent the intensities of SERS and normal Raman scattering, whereas  $N_{\text{SERS}}$  and  $N_{\text{BULK}}$ , respectively, denote the numbers of corresponding 4-ATP molecules effectively excited by a laser beam. According to the above formula, the EF for the  $\text{Co}_3\text{O}_4/\text{AgNPs}$  substrate is calculated to be  $9.29 \times 10^6$ . The EF is calculated to be  $3.77 \times 10^7$  for the  $\text{Co}_3\text{O}_4/\text{Co}_3\text{S}_4/\text{AgNPs}$  substrate. As a result, the EF for the  $\text{Co}_3\text{O}_4/\text{Co}_3\text{S}_4/\text{AgNPs}$  substrate shows a 4.06-fold enhancement compared to the  $\text{Co}_3\text{O}_4/\text{AgNPs}$  substrate.

$$N_{\text{BULK}} = (\text{Laser spot area} / \text{Diffusion area}) \times (N_{\text{A}} \times \text{Volume}_{\text{BULK}} \times \text{Concentration}_{\text{BULK}})$$

$$N_{\text{SERS}} = (\text{Laser spot area} / \text{Substrate area}) \times (N_{\text{A}} \times \text{Volume}_{\text{SERS}} \times \text{Concentration}_{\text{SERS}})$$

$$\text{Diffusion area} = \pi(d/2)^2 = 0.5027 \text{ cm}^2$$

$$\text{Substrate area} = 0.25 \text{ cm}^2$$

$$\text{Volume}_{\text{BULK}} = \text{Volume}_{\text{SERS}}$$

$$\text{Concentration}_{\text{BULK}} = 10^5 \times \text{Concentration}_{\text{SERS}}$$

$$N_{\text{BULK}} / N_{\text{SERS}} = (0.25 / 0.5027) \times 10^5 = 5 \times 10^4$$

$$I = \text{intensity of the } 1075 \text{ cm}^{-1} \text{ peak}$$

$$I_{\text{BULK}} = 1107.33$$

$$I_{\text{SERS, Co}_3\text{O}_4/\text{AgNPs}} = 205835.09$$

$$I_{\text{SERS, Co}_3\text{O}_4/\text{AgNPs}} / I_{\text{BULK}} = 185.88$$

$$\text{EF}_{\text{Co}_3\text{O}_4/\text{AgNPs}} = (I_{\text{SERS}} / I_{\text{BULK}}) \times (N_{\text{BULK}} / N_{\text{SERS}}) = 9.29 \times 10^6$$

$$I_{\text{SERS, Co}_3\text{O}_4/\text{Co}_3\text{S}_4/\text{AgNPs}} = 834196.49$$

$$I_{\text{SERS, Co}_3\text{O}_4/\text{Co}_3\text{S}_4/\text{AgNPs}} / I_{\text{BULK}} = 753.34$$

$$\text{EF}_{\text{Co}_3\text{O}_4/\text{Co}_3\text{S}_4/\text{AgNPs}} = (I_{\text{SERS}} / I_{\text{BULK}}) \times (N_{\text{BULK}} / N_{\text{SERS}}) = 3.77 \times 10^7$$

$$\text{EF}_{\text{Co}_3\text{O}_4/\text{Co}_3\text{S}_4/\text{AgNPs}} / \text{EF}_{\text{Co}_3\text{O}_4/\text{AgNPs}} = 3.77 \times 10^7 / 9.29 \times 10^6 = 4.06$$
